# Supplementary material
Source: PubMed Central journal article supplement (PMC4394274)
Supplement: pnas.1503739112.sapp.pdf [file pnas.1503739112.sapp.pdf]

Supporting Information for  
Evidence for Tunneling in Base Catalyzed Isomerization of Glyceraldehyde to Dihydroxyacetone by  
Hydride Shift under Formose Conditions

Liang Cheng, Charles Doubleday,\* and Ronald Breslow\*

Department of Chemistry, Columbia University, 3000 Broadway, New York, NY 10027

[ced3@columbia.edu](mailto:ced3@columbia.edu), [rb33@columbia.edu](mailto:rb33@columbia.edu)

TABLE OF CONTENTS

|    |                                                                      |     |
|----|----------------------------------------------------------------------|-----|
| 1  | MATERIAL AND METHODS                                                 | S2  |
| 2  | PREPARATION OF CARBONYL HYDRAZONES                                   | S3  |
| 3  | HPLC ASSAY                                                           | S4  |
| 4  | NMR SPECTRA                                                          | S9  |
| 5  | REFERENCES TO PARTS 1 - 4                                            | S11 |
| 6  | FULL REFERENCES 16 AND 18                                            | S12 |
| 7  | ELECTRONIC STRUCTURE CALCULATIONS                                    | S13 |
| 8  | FIGURE S8. PLOTS OF $\kappa_{\text{SCT}}(T)$ CONTRIBUTIONS VS ENERGY | S16 |
| 9  | PROCEDURE FOR POLYRATE CALCULATIONS; DAT FILE EXAMPLE                | S17 |
| 10 | POLYRATE $\kappa_{\text{SCT}}(T)$ AND FORWARD RATES                  | S19 |

## 1. MATERIAL AND METHODS

Solvents, organic/inorganic reagents were purchased from commercial vendors either with a guarantee certificate for absence of the following enzyme traces: DNase, RNase, proteases and phosphatases or of highest purity available, and were used without further purification unless otherwise mentioned.

Solvents for HPLC were purchased from Thermo Fisher Scientific of “HPLC” grade and filtered after mixing through MicroLiter 0.2  $\mu\text{m}$  Nylon filters.

NMR spectra were obtained on a Bruker Avance III 400 (400 MHz) spectrometer.

Analytical HPLC was run on a Waters 600 liquid chromatograph equipped with a pumping system, an autosampler (717 plus), a photodiode array UV–Vis detector (2996), and a Waters SunFire™ end-capped  $\text{C}_{18}$  reverse–phase analytical column (4.6 mm internal diameter  $\times$  150 mm length, particle size: 5 nm, particle shape: spherical, pore size: 100 Å, carbon load: 16 %). The reaction solution was analyzed with UV–Vis detection at 365 nm. The elution was 40 %  $\text{CH}_3\text{CN}$  in water at a flow rate of 1.0  $\text{mL}\cdot\text{min}^{-1}$ .

The hydrolysis and incubation procedures were performed using VWR Analog Dry Block Heaters equipped with VWR Modular Heating Blocks. Temperature stabilities were kept at  $\pm 0.5$  °C (for the hydrolysis at 40 °C and incubation at 37 °C) and  $\pm 1$  °C (for the hydrolysis at 80 °C). Hydrolysis at 0 °C was conducted using an ice-water complex.

D-[2- $^2\text{H}$ ]glyceraldehyde (2-deuteroglyceraldehyde) was purchase from Omicron Biochemicals, Inc. as an aqueous solution of 0.115 M (98 atom%  $^2\text{H}$ ).

### Abbreviations:

|              |                                             |
|--------------|---------------------------------------------|
| GLA          | Glyceraldehyde                              |
| DHA          | Dihydroxyacetone                            |
| 2,4-DNP      | 2,4-Dinitrophenylhydrazone                  |
| GLA-2,4-DNPH | Glyceraldehyde 2,4-dinitrophenylhydrazone   |
| DHA-2,4-DNPH | Dihydroxyacetone 2,4-dinitrophenylhydrazone |
| Ac-2,4-DNPH  | Acetone 2,4-dinitrophenylhydrazone          |

## 2. PREPARATION OF CARBONYL HYDRAZONES

### 2.1 Preparation of GLA-2,4-DNPHs<sup>1</sup>

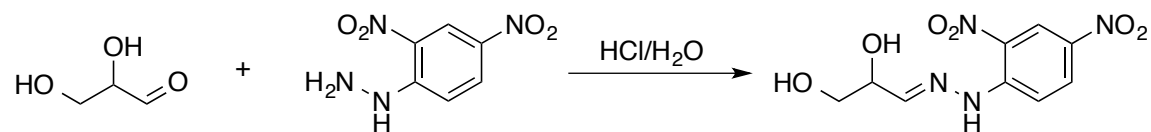

A solution of 0.4 g (4.4 mmol) of D/L-GLA dimer in 2.5 mL of water at 0 °C was added to a solution of 0.8 g (4 mmol) of 2,4-DNP in 48 mL of 2N hydrochloride solution at 0 °C. After the mixture was stirred at 0 °C for 6 hours, the precipitate was filtrated, washed with 2N hydrochloride and water, yield 1.045 g (97 %) as a yellow solid, which contains only D/L-GLA-2,4-DNPH. <sup>1</sup>H NMR (DMSO-*d*<sub>6</sub>) δ 3.57-3.58 (2H, *J* = 5.6 Hz, HO-CH<sub>2</sub>), 4.18-4.23 (dd, 1H, *J* = 5.6 Hz, 11.6 Hz, HO-CH), 7.92-7.98 (m, 2H, NH-C-CH-CH, N-CH), 8.35-8.38 (dd, 1H, *J* = 2.4 Hz, 9.6 Hz, CH-CH-C-NO<sub>2</sub>), 8.846-8.853 (d, 1H, *J* = 2.8 Hz, O<sub>2</sub>N-C-CH-C-NO<sub>2</sub>), 11.39 (s, 1H, NH). <sup>13</sup>C NMR (DMSO-*d*<sub>6</sub>) δ 64.5 (HO-CH<sub>2</sub>-CH), 72.1 (HO-CH-C), 117.0 (NH-C-CH-C), 123.4 (O<sub>2</sub>N-C-CH-C-NO<sub>2</sub>), 129.6 (O<sub>2</sub>N-C-CH-C-NH), 130.2 (NH-C-CH-CH), 137.3 (NH-C-CH-CH-C-NO<sub>2</sub>), 145.3 (NH-C), 155.1 (N-C-CH<sub>2</sub>).

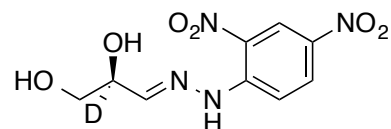

The deuterated hydrazone D-[2-<sup>2</sup>H]-GLA-2,4-DNPH was isolated after the HPLC assay by preparative TLC. <sup>1</sup>H NMR (DMSO-*d*<sub>6</sub>) δ 3.53-3.55 (2H, *J* = 5.2 Hz, HO-CH<sub>2</sub>), 4.83-4.86 (t, 1H, *J* = 5.7 Hz, HO-CH<sub>2</sub>), 5.39 (s, 1H, HO-CD), 7.88-7.94 (m, 2H, NH-C-CH-CH, N-CH), 8.31-8.33 (d, 1H, *J* = 7.6 Hz, CH-CH-C-NO<sub>2</sub>), 8.83-8.84 (d, 1H, *J* = 2.4 Hz, O<sub>2</sub>N-C-CH-C-NO<sub>2</sub>), 11.42 (s, 1H, NH).

### 2.2 Preparation of DHA-2,4-DNPH<sup>2</sup>

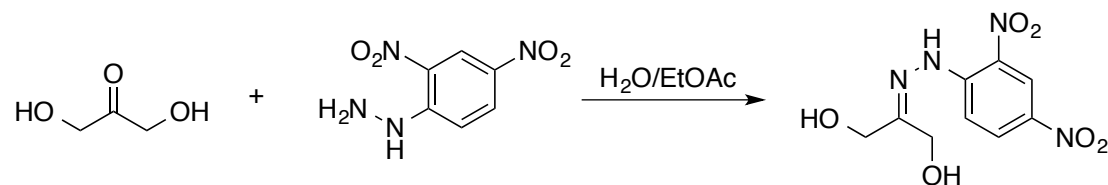

DHA-2,4-DNPH was prepared according to the literature starting from 1,3-DHA dimer. <sup>1</sup>H NMR (DMSO-*d*<sub>6</sub>) δ 4.11-4.12 (d, 2H, *J* = 6.0 Hz, C-CH<sub>2</sub>-O), 4.56 (s, 2H, C-CH<sub>2</sub>-O), 5.27-5.30 (t, 1H, *J* = 6.0 Hz, CH<sub>2</sub>-OH), 6.37 (s, 1H, CH<sub>2</sub>-OH), 7.94-7.97 (d, 1H, *J* = 9.6 Hz, NH-C-CH-CH), 8.36-8.39 (dd, 1H, *J* = 2.4 Hz, 9.6 Hz, CH-CH-C-NO<sub>2</sub>), 8.88-8.89 (d, 1H, *J* = 2.4 Hz, O<sub>2</sub>N-C-CH-C-NO<sub>2</sub>), 13.15 (s, 1H, NH). <sup>13</sup>C NMR (DMSO-*d*<sub>6</sub>) δ 60.8 (C-CH<sub>2</sub>-OH), 63.8 (C-CH<sub>2</sub>-OH), 116.2 (NH-C-CH-C), 123.6 (O<sub>2</sub>N-C-CH-C-NO<sub>2</sub>), 129.5 (O<sub>2</sub>N-C-CH-C-NH), 130.3 (NH-C-CH-CH), 137.1 (NH-C-CH-CH-C-NO<sub>2</sub>), 145.2 (NH-C), 158.8 (N-C-CH<sub>2</sub>).

### 3. HPLC ASSAY<sup>3-6</sup>

Reaction solutions were prepared by combining appropriate amount of GLA and  $\text{Ca}(\text{OH})_2$  to give a reaction mixture. A representative reaction solutions were prepared by combining D-GLA (10  $\mu\text{L}$ , 100 mM),  $\text{Ca}(\text{OH})_2$  (30  $\mu\text{L}$ , 20 mM) and water (960  $\mu\text{L}$ ). The final concentration was D-GLA 1 mM,  $\text{Ca}(\text{OH})_2$  0.6 mM, pH  $\sim 10$ .

GLAs and their isomerization products DHAs were derivatized as the hydrazones (GLA-2,4-DNPH, DHA-2,4-DNPH) using excess 2,4-DNP at 37 °C for 1 hour. To carry out these reactions, samples were removed from the block heater (40 °C/80 °C) or ice (0 °C) at appropriate intervals, immediately mixed with  $\text{CH}_3\text{CN}$  (40  $\mu\text{L}$ ) and 5  $\mu\text{L}$  of 2,4-DNP (5 mM in 20 %  $\text{HClO}_4/\text{CH}_3\text{CN}$ ). The tube was capped, vigorously mixed, and submerged in a thermally equilibrated block heater at 37 °C. After incubating for 1 hour, the samples were removed and the solution pH was adjusted to  $\sim 7$  by adding HEPES buffer (15 $\sim$ 20  $\mu\text{L}$ , pH 10) to prevent potential degradation of the formed hydrazones. Ac-2,4-DNPH (analytical standard purchased from Sigma-Aldrich) was added as the internal standard. Precipitated 2,4-DNP was removed by filtration, and then the samples were analyzed by HPLC ( $\lambda^{\text{max}}$  365 nm). A representative HPLC spectrum was as following (Figure S1):

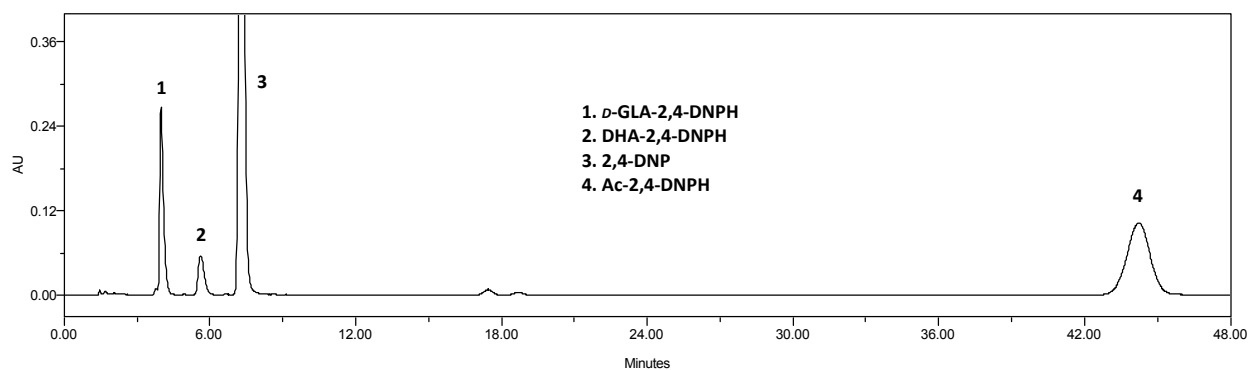

Figure S1. HPLC chromatogram of a reaction solution

A comparison of DHA-2,4-DNPH and Ac-2,4-DNPH was used to confirm that derivatization reactions were completed within 1 hour (Figure S2).

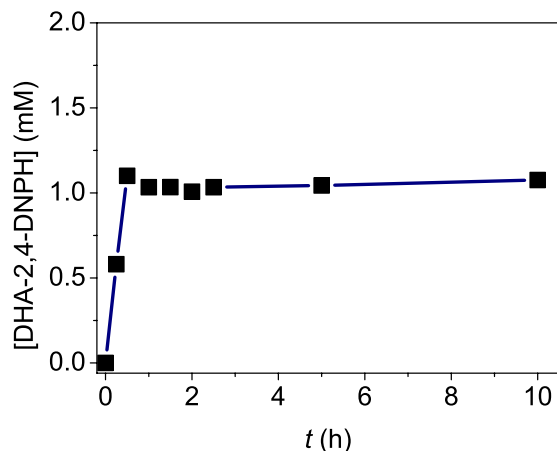

Figure S2. Derivatization of DHA with excess 2,4-DNP is completed within 1 hour at 37 °C.

The stabilities of DHA-2,4-DNPH and Ac-2,4-DNPH in the final solution after the adjustment of pH to ~7 were also determined (Figure S4).

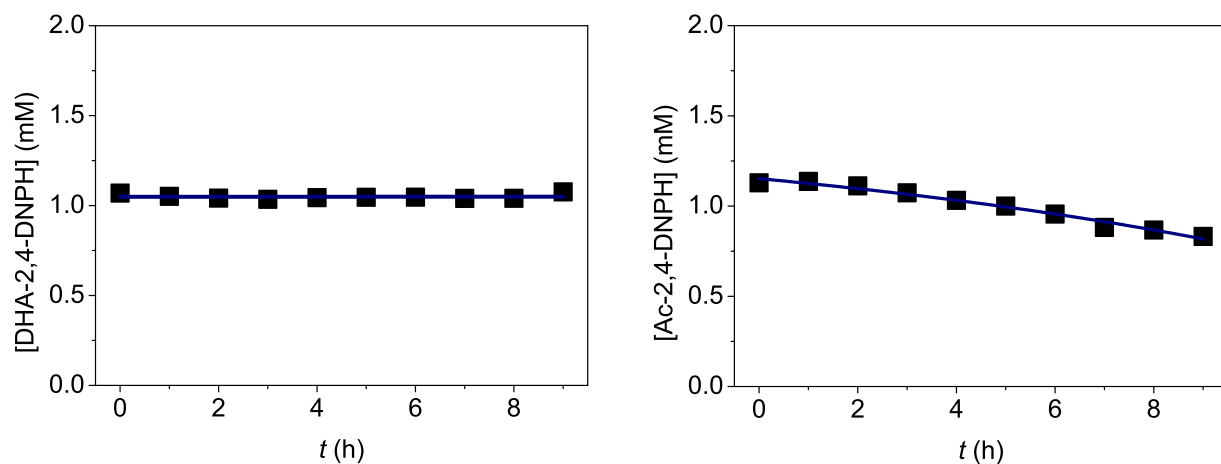

Figure S3. Stability of DHA-2,4-DNPH and Ac-2,4-DNPH after adjustment of pH to ~7. Less than 5% and 15 % depletion were observed over 9 hours, for DHA-2,4-DNPH and Ac-2,4-DNPH, respectively.

A comparison of  $^1\text{H}$  NMR spectra of D-[2- $^2\text{H}$ ]-GLA-2,4-DNPH (before and after 4 hours' isomerization at 40 °C) was used to confirm that no significant deuterium was lost in the isomerization or during the derivatization. Before isomerization, 98 atom%  $^2\text{H}$ . After isomerization, 95 atom%  $^2\text{H}$  (Figure S5).

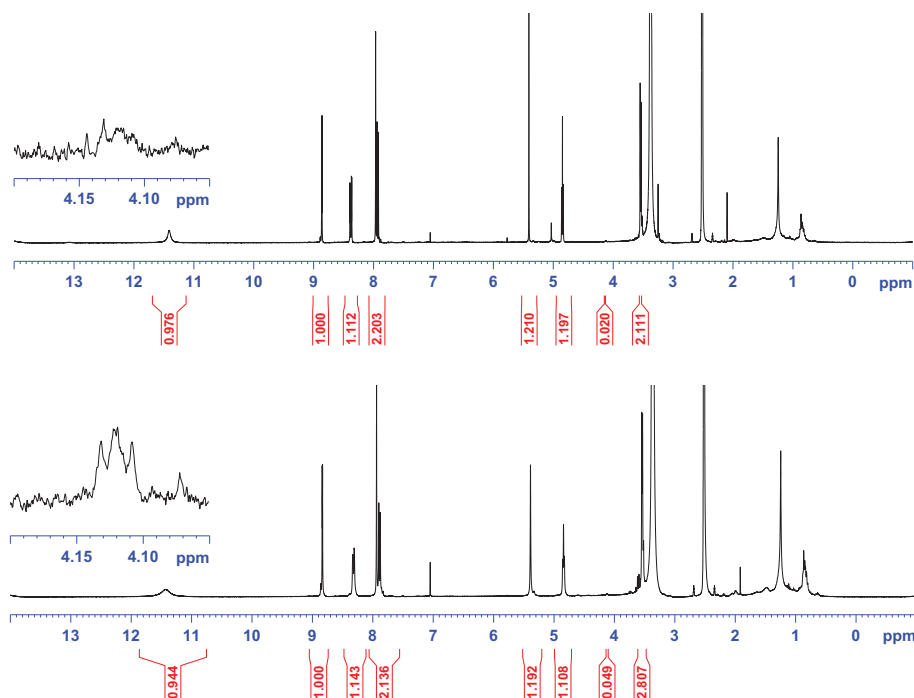

Figure 5. Comparison of deuterium content in the hydrazone derived from D-[2- $^2\text{H}$ ]-GLA before (up) and after the isomerization (down).

Upon each day of chromatography, constants  $m$  and  $b$  of the Equation (S1)

$$[\text{DHA-2,4-DNPH}] = m \times [\text{Ac-2,4-DNPH}] \times \frac{\% \text{Area}_{\text{DHA-2,4-DNPH}}}{\% \text{Area}_{\text{Ac-2,4-DNPH}}} + b \quad (\text{S1})$$

were determined by a linear fit of the data derived from the injection of at least five calibration standards. These calibration standards were each fixed concentration in internal standard [Ac-2,4-DNPH] and varied in DHA-2,4-DNPH concentration [DHA-2,4-DNPH]. A representative standard sample result was as following (Table S1, Figure S5):

Table S1. Determination of  $m$  &  $b$

| No. | [Ac-2,4-DNPH]<br>(mM) | [DHA-2,4-DNPH]<br>(mM) | %Area <sub>Ac-2,4-DNPH</sub> | %Area <sub>DHA-2,4-DNPH</sub> | $\frac{[\text{Ac-2,4-DNPH}] \times \% \text{Area}_{\text{DHA-2,4-DNPH}}}{\% \text{Area}_{\text{Ac-2,4-DNPH}}}$<br>(mM) |
|-----|-----------------------|------------------------|------------------------------|-------------------------------|------------------------------------------------------------------------------------------------------------------------|
| 1   | 1                     | 1                      | 49.09                        | 50.91                         | 1.04                                                                                                                   |
| 2   | 1                     | 2                      | 38.01                        | 61.99                         | 1.63                                                                                                                   |
| 3   | 1                     | 3                      | 27.04                        | 72.96                         | 2.70                                                                                                                   |
| 4   | 1                     | 4                      | 20.96                        | 79.04                         | 3.77                                                                                                                   |
| 5   | 1                     | 5                      | 17.73                        | 82.27                         | 4.64                                                                                                                   |

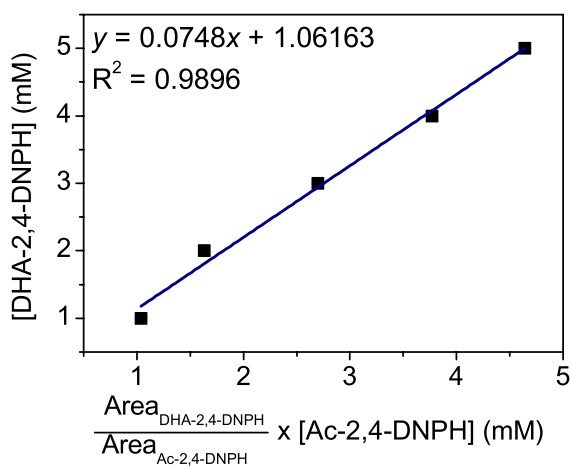

Figure S5. Determination of  $m$  and  $b$ .

DHA-2,4-DNPH concentration in the reaction samples [DHA-2,4-DNPH] were obtained from the above equation [Equation S1] using the concentration of the standard [Ac-2,4-DNPH] in the final solution. The pseudo-first-order rate constant  $k_{\text{obs}}$  for the isomerization were obtained from dividing the slope of a plot of [DHA-2,4-DNPH] vs. time by the initial concentration of GLA used [Equation S2]. A minimum of five data points was used to calculate rate constants. Each point was the average result of three parallel samples at the same interval. The calculation was processed with Origin program (OriginPro 8, OriginLab Corporation).

$$k_{\text{obs}} = \frac{d[\text{DHA-2,4-DNPH}]/dt}{[\text{GLA}]} \quad (\text{S2})$$

A representative procedure for the hydrolysis and the data processing were as following (Table S2, Figure S6):

To a solution containing 30  $\mu\text{L}$  of  $\text{Ca}(\text{OH})_2$  (20 mM) and 960  $\mu\text{L}$  of water (pH  $\sim$ 10) was added 10  $\mu\text{L}$  of D-GLA (1 mM). The tube was then put in a thermally equilibrated block heater at 80  $^\circ\text{C}$ . Three samples (5  $\mu\text{L}$  each) were retrieved at fixed interval (1 min), mixed with 2,4-DNP (5  $\mu\text{L}$ , 5 mM in 20 %  $\text{HClO}_4/\text{CH}_3\text{CN}$ ) and  $\text{CH}_3\text{CN}$  (40  $\mu\text{L}$ ). The tube was capped, vigorously mixed, and submerged in a thermally equilibrated block heater at 37  $^\circ\text{C}$ . After an incubation of 1 hour, the derivation was quenched by adding HEPES buffer (15  $\mu\text{L}$ , 1 M, pH  $\sim$ 10), and then mixed with Ac-2,4-DNPH (15  $\mu\text{L}$ , 0.5 mM) and  $\text{CH}_3\text{CN}$  (80  $\mu\text{L}$ ). The precipitation was filtrated and the sample was then subjected to the HPLC analysis.

Table S2. A representative data processing.

| No. | Time (min) | [DHA-2,4-DNPH] (mM) <sup>a</sup> |
|-----|------------|----------------------------------|
| 1   | 1          | 0.135 $\pm$ 0.002                |
| 2   | 2          | 0.143 $\pm$ 0.007                |
| 3   | 3          | 0.159 $\pm$ 0.025                |
| 4   | 4          | 0.169 $\pm$ 0.021                |
| 5   | 5          | 0.176 $\pm$ 0.003                |
| 6   | 6          | 0.191 $\pm$ 0.029                |
| 7   | 7          | 0.193 $\pm$ 0.008                |
| 8   | 8          | 0.223 $\pm$ 0.015                |
| 9   | 9          | 0.218 $\pm$ 0.036                |
| 10  | 10         | 0.246 $\pm$ 0.036                |

<sup>a</sup> Results  $\pm$  SEM are the average of three parallel samples.

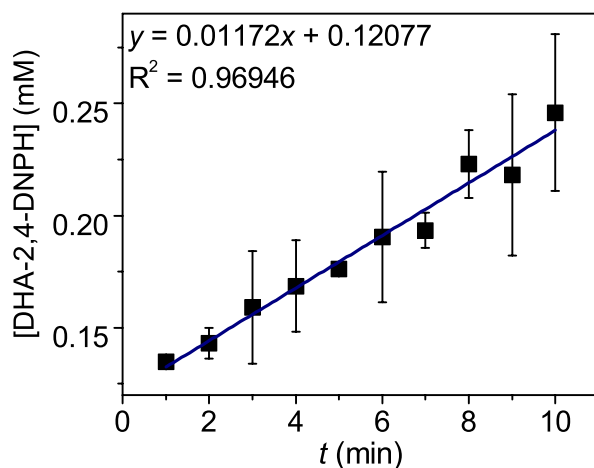

Figure S6. A representative data processing (Error bars represent SEM of three parallel samples)

Arrhenius plots [Equation S3, Table S3, Figure S7] of D-GLA and D-[2-<sup>2</sup>H]-GLA were as following:

$$\ln k = \ln A - \frac{E_a}{R} \times \frac{1}{T} \quad (\text{S3})$$

Table S3. First-order rate constants for glyceraldehydes to dihydroxyacetone, and the KIE of the isomerization reaction<sup>a</sup>

| Temp. (°C) | <i>T</i> (K) | 1/ <i>T</i> (K <sup>-1</sup> ) | <i>k</i> <sub>H</sub> (h <sup>-1</sup> ) <sup>b</sup> | ln <i>k</i> <sub>H</sub> | <i>k</i> <sub>D</sub> (h <sup>-1</sup> ) <sup>b</sup> | ln <i>k</i> <sub>D</sub> | KIE ( <i>k</i> <sub>H</sub> / <i>k</i> <sub>D</sub> ) <sup>c</sup> |
|------------|--------------|--------------------------------|-------------------------------------------------------|--------------------------|-------------------------------------------------------|--------------------------|--------------------------------------------------------------------|
| 0          | 273          | 0.0366                         | 0.07 ± 0.02                                           | -2.66 ± 0.76             | 0.005 ± 0.001                                         | -5.35 ± 1.06             | 14.9 ± 4.0                                                         |
| 40         | 313          | 0.0319                         | 0.30 ± 0.02                                           | -1.20 ± 0.08             | 0.03 ± 0.01                                           | -3.44 ± 1.17             | 9.3 ± 2.6                                                          |
| 80         | 353          | 0.0283                         | 2.52 ± 0.44                                           | 0.92 ± 0.16              | 0.49 ± 0.23                                           | -0.71 ± 0.33             | 5.1 ± 1.8                                                          |

<sup>a</sup> Conditions: glyceraldehyde 1 mM, Ca(OH)<sub>2</sub> 0.6 mM, pH ~10.

<sup>b</sup> Results ± SEM are the average of at least three independent experiments.

<sup>c</sup> KIE values were calculated based on unrounded rate constants.

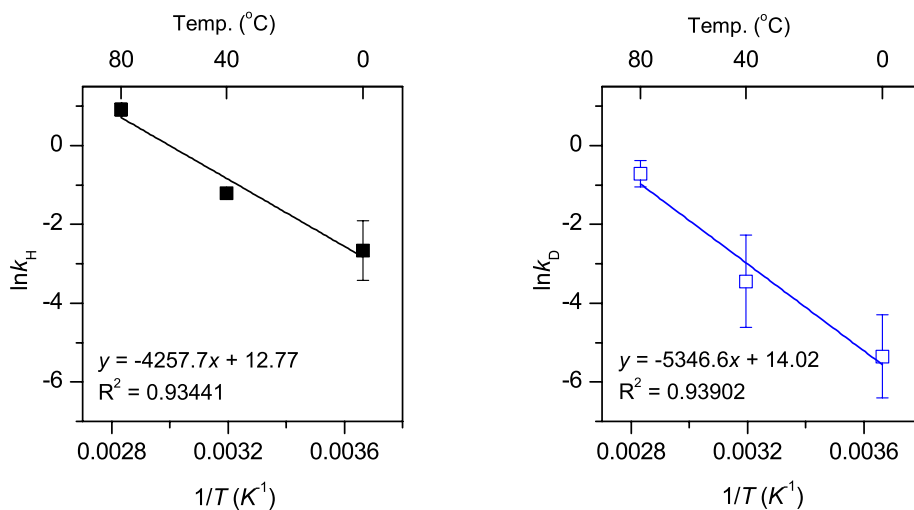

|                                    |                 |                                    |                  |
|------------------------------------|-----------------|------------------------------------|------------------|
| Slope [ $-E_{a(H)}/R$ ] (K)        | $-4258 \pm 786$ | Slope [ $-E_{a(D)}/R$ ] (K)        | $-5347 \pm 838$  |
| Intercept [ $\ln A_H$ ]            | $12.8 \pm 2.6$  | Intercept [ $\ln A_D$ ]            | $14.0 \pm 2.7$   |
| $E_{a(H)}$ (kJ mol <sup>-1</sup> ) | $35.4 \pm 6.5$  | $E_{a(D)}$ (kJ mol <sup>-1</sup> ) | $44.5 \pm 7.0$   |
| $A_H$                              | $97.9 \pm 19.6$ | $A_D$                              | $344.2 \pm 66.6$ |

Figure S7. Arrhenius plots of D-GLA and D-[2-<sup>2</sup>H]-GLA (Error bars represent SEM of at least three independent experiments. Results were presented as mean ± SEM)



# 4. NMR SPECTRA

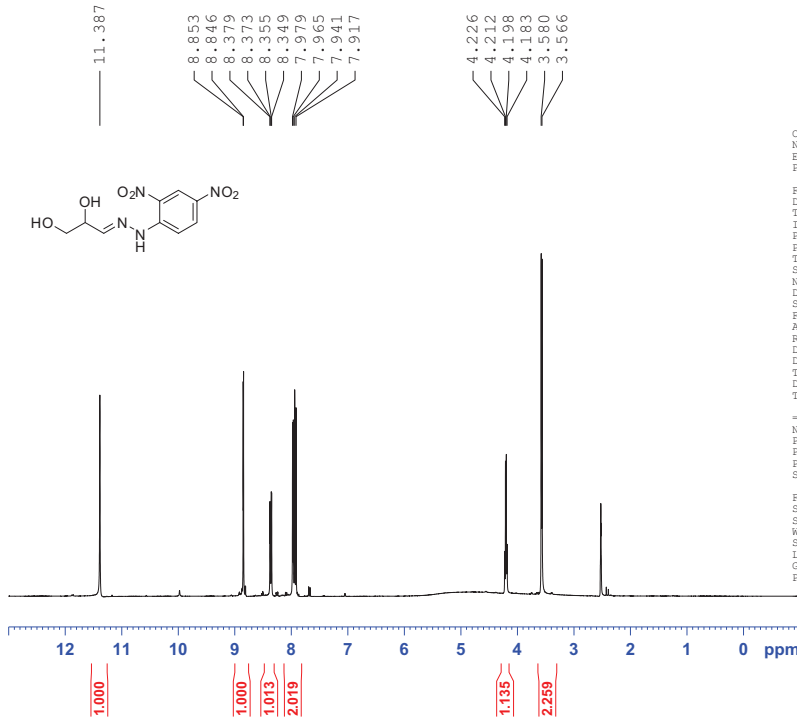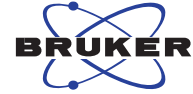

```

Current Data Parameters
NAME          CL-0525-GLA-DNPH
EXPNO        100
PROCNO       1

F2 - Acquisition Parameters
Date_        20140707
Time         21.51
INSTRUM      spect
PROBHD       5 mm PABBI 1H/
PULPROG      zg30
TD           32768
SOLVENT      DMSO
NS           24
DS           0
SWH          6009.615 Hz
FIDRES      0.183399 Hz
AQ           2.7263477 sec
RG           53
DW           83.200 usec
DE           6.50 usec
TE           300.2 K
D1           1.00000000 sec
TD0          1

===== CHANNEL f1 =====
NUC1         1H
P1           7.25 usec
PL1          0.00 dB
PL1W        12.20776844 W
SF01        399.9225995 MHz

F2 - Processing parameters
SI           32768
SF          399.9200000 MHz
WDW          EM
SSB          0
LB           0.20 Hz
GB           0
PC           1.00
    
```

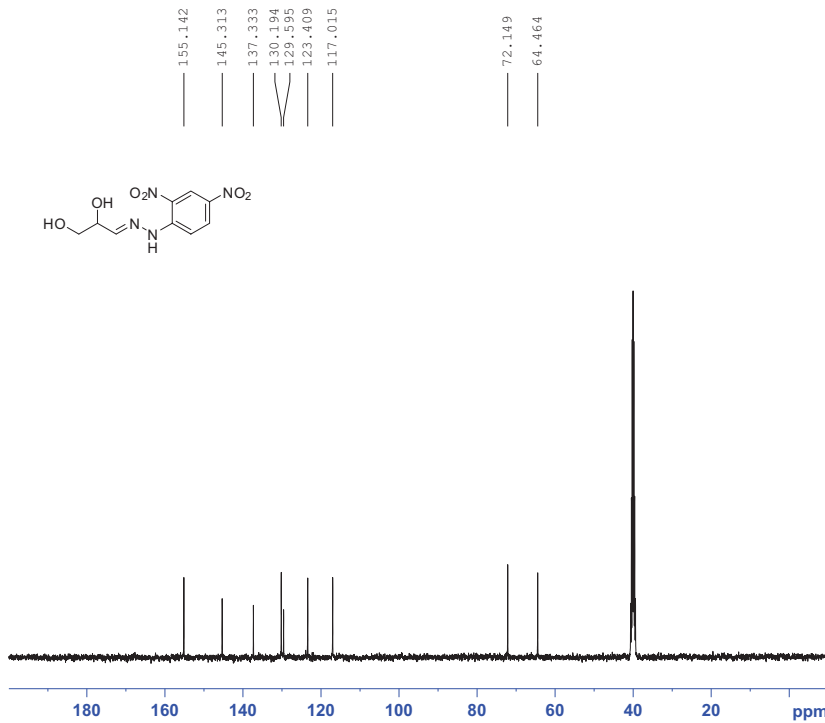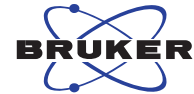

```

Current Data Parameters
NAME          CL-0525-GLA-DNPH-C
EXPNO        100
PROCNO       1

F2 - Acquisition Parameters
Date_        20140707
Time         21.54
INSTRUM      spect
PROBHD       5 mm PABBI 1H/
PULPROG      zgpg30
TD           32768
SOLVENT      DMSO
NS           423
DS           0
SWH          24038.461 Hz
FIDRES      0.733556 Hz
AQ           0.6816244 sec
RG           233
DW           20.800 usec
DE           6.50 usec
TE           300.0 K
D1           0.68999999 sec
D11          0.03000000 sec
TD0          1

===== CHANNEL f1 =====
NUC1         13C
P1           14.00 usec
PL1          -4.60 dB
PL1W        94.90110779 W
SF01        100.62510256 MHz

===== CHANNEL f2 =====
CPDPRG2      waltz16
NUC2         1H
PCPD2       90.00 usec
PL2          0.00 dB
PL12        21.88 dB
PL13        120.00 dB
PL1W        12.20776844 W
PL12W       0.07918380 W
PL13W       0.00000000 W
SF02        399.9215997 MHz

F2 - Processing parameters
SI           32768
SF          100.5599640 MHz
WDW          EM
SSB          0
LB           3.00 Hz
GB           0
PC           1.40
    
```

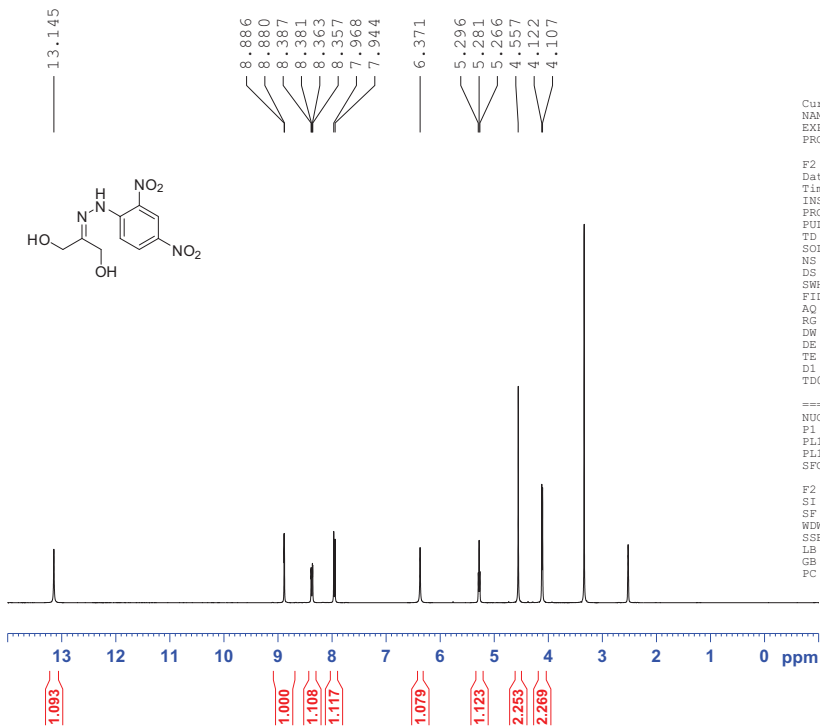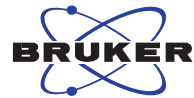

Current Data Parameters  
 NAME CL-0525-DHA-DNPH  
 EXPNO 10  
 PROCNO 1

F2 - Acquisition Parameters  
 Date\_ 20140707  
 Time 21.28  
 INSTRUM spect  
 PROBRD 5 mm PABBI 1H/  
 PULPROG zg30  
 TD 32768  
 SOLVENT DMSO  
 NS 32  
 DS 0  
 SWH 6009.615 Hz  
 FIDRES 0.183399 Hz  
 AQ 2.7263477 sec  
 RG 80.6  
 DW 83.200 usec  
 DE 6.50 usec  
 TE 300.1 K  
 D1 1.00000000 sec  
 TDO 1

===== CHANNEL f1 =====  
 NUC1 1H  
 P1 7.25 usec  
 PL1 0.00 dB  
 PLW 12.20776844 W  
 SF01 399.9225995 MHz

F2 - Processing parameters  
 SI 32768  
 SF 399.920000 MHz  
 WDW EM  
 SSB 0  
 LB 0.20 Hz  
 GB 0  
 FC 1.00

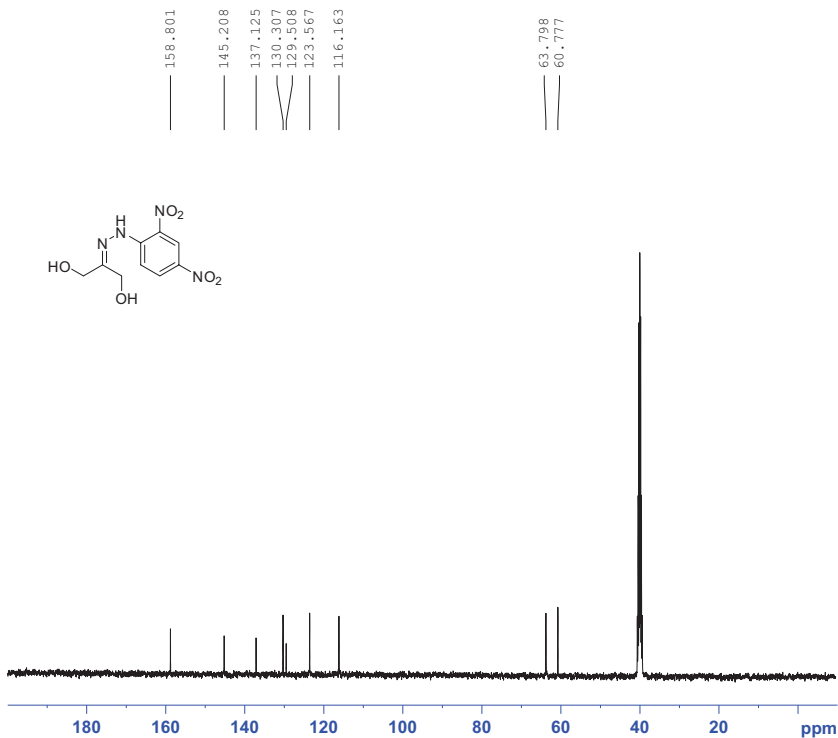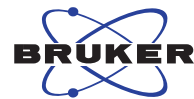

Current Data Parameters  
 NAME CL-0525-DHA-DNPH-C  
 EXPNO 10  
 PROCNO 1

F2 - Acquisition Parameters  
 Date\_ 20140707  
 Time 21.32  
 INSTRUM spect  
 PROBRD 5 mm PABBI 1H/  
 PULPROG zgpg30  
 TD 32768  
 SOLVENT DMSO  
 NS 696  
 DS 0  
 SWH 24038.461 Hz  
 FIDRES 0.733596 Hz  
 AQ 0.6816244 sec  
 RG 203  
 DW 20.800 usec  
 DE 4.50 usec  
 TE 300.1 K  
 D1 0.69999999 sec  
 D11 0.03000000 sec  
 TDO 1

===== CHANNEL f1 =====  
 NUC1 13C  
 P1 14.00 usec  
 PL1 -1.60 dB  
 PLW 94.90110779 W  
 SF01 100.5710256 MHz

===== CHANNEL f2 =====  
 CPDPRG2 waltz16  
 NUC2 1H  
 PCPD2 90.00 usec  
 PL2 0.00 dB  
 PL12 21.88 dB  
 PL13 120.00 dB  
 PLW 12.20776844 W  
 PL12W 0.07918380 W  
 PL13W 0.00000000 W  
 SF02 399.9215997 MHz

F2 - Processing parameters  
 SI 32768  
 SF 100.5599640 MHz  
 WDW EM  
 SSB 0  
 LB 3.00 Hz  
 GB 0  
 FC 1.40

## 5. REFERENCES

- (1) Wolfrom ML, Arsenault GP (1960) Preparation of 2,4-dinitrophenylhydrazine derivatives of highly oxygenated carbonyl compounds. *J Org Chem* 25(20): 205–208.
- (2) Sagi VN, Punna V, Hu F, Meher G, Krishnamurthy R (2012) Exploratory experiments on the chemistry of the “glyoxylate scenario”: formation of ketosugars from dihydroxyfumarate. *J Am Chem Soc* 134(7): 3577–3589.
- (3) Brammer LA, Meyers CF (2009) Revealing substrate promiscuity of 1-deoxy-D-xylulose 5-phosphate synthase. *Org Lett* 11(20): 4748–4751.
- (4) Hu Y, Wang XJ, Li H, Gao WY (2012) Determination of steady-state kinetic parameters of 1-deoxy-D-xylulose-5-phosphate synthase by pre-column derivatization high performance liquid chromatography using 2,4-dinitrophenylhydrazine as derivative reagent. *Chinese J Anal Chem* 40(12): 1859–1864.
- (5) Zhu YM, Cui Q, Wang HY (2010) Determination of glyoxal and glyoxalic acid in aldehyde solution by high performance liquid chromatography. *Chinese J Chromatog* 28(1): 59–63.
- (6) Yan KP, Jing XD, Han J, Dan N, Chen C (2009) Detection of residual glutaraldehyde in hemoglobin-based oxygen carrier with high performance liquid chromatography. *Chinese J Anal Chem* 37(10): 1515–1518.

### **Full Polyrate reference 28**

J. Zheng, S. Zhang, B. J. Lynch, J. C. Corchado, Y.-Y. Chuang, P. L. Fast, W.-P. Hu, Y.-P. Liu, G. C. Lynch, K. A. Nguyen, C. F. Jackels, A. Fernandez Ramos, B. A. Ellingson, V. S. Melissas, J. Villà, I. Rossi, E. L. Coitiño, J. Pu, T. V. Albu, R. Steckler, B. C. Garrett, A. D. Isaacson, and D. G. Truhlar, POLYRATE – version 2010-A, University of Minnesota, Minneapolis, MN 2010.

### **Full Gaussian reference 29**

Gaussian 09, Revision D.01, M. J. Frisch, G. W. Trucks, H. B. Schlegel, G. E. Scuseria, M. A. Robb, J. R. Cheeseman, G. Scalmani, V. Barone, B. Mennucci, G. A. Petersson, H. Nakatsuji, M. Caricato, X. Li, H. P. Hratchian, A. F. Izmaylov, J. Bloino, G. Zheng, J. L. Sonnenberg, M. Hada, M. Ehara, K. Toyota, R. Fukuda, J. Hasegawa, M. Ishida, T. Nakajima, Y. Honda, O. Kitao, H. Nakai, T. Vreven, J. A. Montgomery, Jr., J. E. Peralta, F. Ogliaro, M. Bearpark, J. J. Heyd, E. Brothers, K. N. Kudin, V. N. Staroverov, T. Keith, R. Kobayashi, J. Normand, K. Raghavachari, A. Rendell, J. C. Burant, S. S. Iyengar, J. Tomasi, M. Cossi, N. Rega, J. M. Millam, M. Klene, J. E. Knox, J. B. Cross, V. Bakken, C. Adamo, J. Jaramillo, R. Gomperts, R. E. Stratmann, O. Yazyev, A. J. Austin, R. Cammi, C. Pomelli, J. W. Ochterski, R. L. Martin, K. Morokuma, V. G. Zakrzewski, G. A. Voth, P. Salvador, J. J. Dannenberg, S. Dapprich, A. D. Daniels, O. Farkas, J. B. Foresman, J. V. Ortiz, J. Cioslowski, and D. J. Fox, Gaussian, Inc., Wallingford CT, 2013.

## Electronic structure calculations

Geometries (Å) and energies of reactant 1, product 2, and saddle point are listed below. Gaussian 09 route directives are listed (excluding those required by Gaussrate). Reaction energetics written by Polyrate are on the next page.

---

### Reactant – Ca-coordinated glyceraldehyde alkoxide

---

b3lyp/6-31++g\*\* int=ultra scrf(solvent=water) freq=noraman  
E = -1020.5904786 au

|    | X         | Y         | Z         |
|----|-----------|-----------|-----------|
| C  | 0.162332  | 1.621778  | -0.126068 |
| O  | -1.026229 | 1.622753  | 0.194528  |
| C  | 0.898914  | 0.365228  | -0.508591 |
| O  | 0.128970  | -0.768715 | -0.482068 |
| C  | 2.140977  | 0.188147  | 0.419687  |
| O  | 2.678417  | -1.104256 | 0.158455  |
| H  | 0.720026  | 2.575773  | -0.150426 |
| H  | 1.302950  | 0.591476  | -1.524464 |
| H  | 1.829352  | 0.261301  | 1.472983  |
| H  | 2.916177  | 0.935340  | 0.224888  |
| H  | 1.876624  | -1.625017 | -0.060424 |
| Ca | -2.105386 | -0.689403 | 0.117998  |

---

### Product – Ca-coordinated dihydroxyacetone alkoxide

---

b3lyp/6-31++g\*\* int=ultra scrf(solvent=water) freq=noraman  
E = -1020.5878834 au

|    | X         | Y         | Z         |
|----|-----------|-----------|-----------|
| C  | 0.084063  | 1.570883  | 0.039663  |
| O  | -1.271954 | 1.400906  | -0.002513 |
| C  | 0.873585  | 0.274085  | -0.005873 |
| O  | 0.302101  | -0.823647 | -0.001867 |
| C  | 2.389015  | 0.291699  | -0.069307 |
| O  | 2.940993  | -1.006178 | 0.062320  |
| H  | 0.448275  | 2.079230  | 0.962215  |
| H  | 0.491983  | 2.194321  | -0.787083 |
| H  | 2.781985  | 0.942065  | 0.721359  |
| H  | 2.678433  | 0.739486  | -1.031805 |
| H  | 2.196561  | -1.630043 | -0.005918 |
| Ca | -2.222317 | -0.685685 | -0.005459 |

---

### Saddle point

---

b3lyp/6-31++g\*\* int=ultra scrf(solvent=water) freq=noraman  
E = -1020.5611184 au

|   | X         | Y         | Z         |
|---|-----------|-----------|-----------|
| C | 0.102929  | 1.504782  | -0.047077 |
| O | -1.181071 | 1.538191  | -0.092184 |
| C | 0.829410  | 0.256431  | 0.022242  |
| O | 0.205706  | -0.875142 | -0.001839 |
| C | 2.312828  | 0.226245  | 0.357520  |

|    |           |           |           |
|----|-----------|-----------|-----------|
| O  | 2.938747  | -0.889053 | -0.268751 |
| H  | 0.687340  | 2.430939  | 0.048141  |
| H  | 0.766353  | 0.989363  | -1.161103 |
| H  | 2.396202  | 0.148167  | 1.452184  |
| H  | 2.829904  | 1.133705  | 0.036811  |
| H  | 2.272814  | -1.598514 | -0.256769 |
| Ca | -2.206534 | -0.661018 | 0.039341  |

### Saddle point

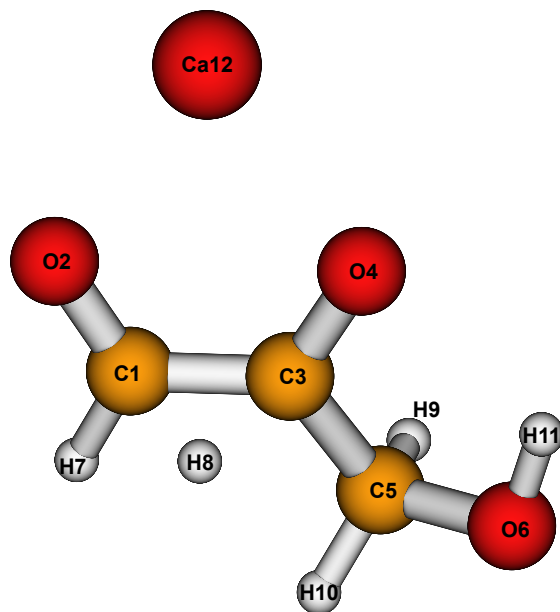

Energetics of saddle point relative to reactant and product (**H isotopomer**)  
(V = classical energy, ZPE = zero point energy)

|                           | hartrees | eV      | cm <sup>**</sup> -1 | kcal    |
|---------------------------|----------|---------|---------------------|---------|
| V w/re reactants V        | 0.02676  | 0.72832 | 5874.24             | 16.7953 |
| V w/re product V          | 0.02936  | 0.79894 | 6443.82             | 18.4238 |
| V+ZPE w/re reactant V     | 0.10588  | 2.88120 | 23238.29            | 66.4416 |
| V+ZPE w/re product V      | 0.10848  | 2.95182 | 23807.87            | 68.0701 |
| V+ZPE w/re reactant V+ZPE | 0.02277  | 0.61955 | 4996.98             | 14.2871 |
| V+ZPE w/re product V+ZPE  | 0.02644  | 0.71959 | 5803.80             | 16.5939 |
| V+ZPE w/re saddle point V | 0.07912  | 2.15289 | 17364.05            | 49.6463 |

### Analogous data for **D isotopomer**

|                           | hartrees | eV      | cm <sup>**</sup> -1 | kcal    |
|---------------------------|----------|---------|---------------------|---------|
| V w/re reactants V        | 0.02676  | 0.72832 | 5874.24             | 16.7953 |
| V w/re product V          | 0.02936  | 0.79894 | 6443.82             | 18.4238 |
| V+ZPE w/re reactant V     | 0.10379  | 2.82419 | 22778.41            | 65.1268 |
| V+ZPE w/re product V      | 0.10638  | 2.89481 | 23347.99            | 66.7553 |
| V+ZPE w/re reactant V+ZPE | 0.02394  | 0.65142 | 5254.00             | 15.0219 |
| V+ZPE w/re product V+ZPE  | 0.02752  | 0.74892 | 6040.39             | 17.2703 |
| V+ZPE w/re saddle point V | 0.07702  | 2.09587 | 16904.18            | 48.3315 |

H: ZPE loss from reactant to TS = 14.2871 - 16.7953 = -2.5082 kcal/mol

D: ZPE loss from reactant to TS = 15.0219 - 16.7953 = -1.7734 kcal/mol

Difference in ZPE loss (H - D): 0.7348 kcal/mol

ISPE: MEP corrected by CCSD(T)/6-31++G\*\*, frequencies not corrected.

Energetics of saddle point relative to reactant and product (**H isotopomer**)  
(V = classical energy, ZPE = zero point energy)

---

|                           | hartrees | eV      | cm** <sup>-1</sup> | kcal    |
|---------------------------|----------|---------|--------------------|---------|
| V w/re reactants V        | 0.03449  | 0.93849 | 7569.40            | 21.6420 |
| V w/re product V          | 0.03344  | 0.91009 | 7340.31            | 20.9870 |
| V+ZPE w/re reactant V     | 0.11361  | 3.09138 | 24933.45           | 71.2883 |
| V+ZPE w/re product V      | 0.11256  | 3.06298 | 24704.36           | 70.6333 |
| V+ZPE w/re reactant V+ZPE | 0.03049  | 0.82973 | 6692.14            | 19.1338 |
| V+ZPE w/re product V+ZPE  | 0.03053  | 0.83074 | 6700.29            | 19.1571 |
| V+ZPE w/re saddle point V | 0.07912  | 2.15289 | 17364.05           | 49.6463 |

Data for **D isotopomer**

---

|                           | hartrees | eV      | cm** <sup>-1</sup> | kcal    |
|---------------------------|----------|---------|--------------------|---------|
| V w/re reactants V        | 0.03449  | 0.93849 | 7569.40            | 21.6420 |
| V w/re product V          | 0.03344  | 0.91009 | 7340.31            | 20.9870 |
| V+ZPE w/re reactant V     | 0.11151  | 3.03436 | 24473.57           | 69.9735 |
| V+ZPE w/re product V      | 0.11047  | 3.00596 | 24244.49           | 69.3185 |
| V+ZPE w/re reactant V+ZPE | 0.03166  | 0.86159 | 6949.16            | 19.8687 |
| V+ZPE w/re product V+ZPE  | 0.03161  | 0.86007 | 6936.88            | 19.8335 |
| V+ZPE w/re saddle point V | 0.07702  | 2.09587 | 16904.18           | 48.3315 |

H/D ZPE loss is based on B3LYP frequencies, see above

**Figure S8.** Contribution to the transmission coefficient  $\kappa_{\text{SCT}}(T)$  for the reaction  $1 \rightarrow 2$  as a function of energy at 200–353 K, for  $1_{\text{H}}$  and  $1_{\text{D}}$ , using the CCSD(T) corrected ISPE procedure. The integral of each curve gives  $\kappa_{\text{SCT}}(T) - 1$ , for the  $\kappa_{\text{SCT}}(T)$  values shown. Contributions go to zero at the top of the barrier, where transmission and reflection cancel.

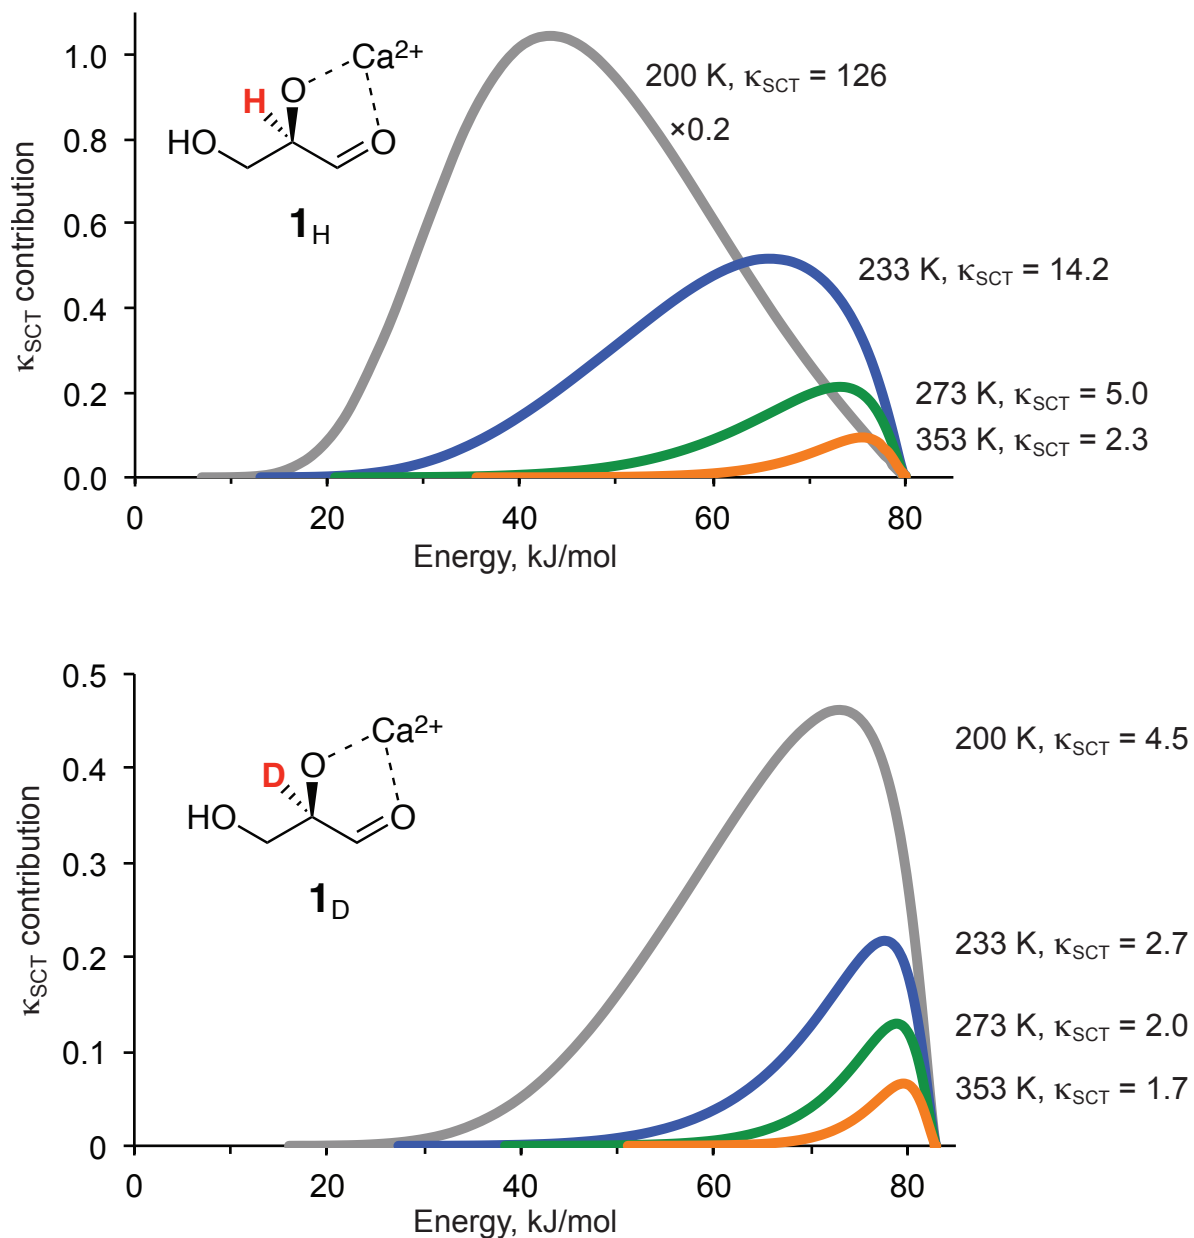



## Procedure for Polyrate calculations

Reaction paths were computed by the Page-McIver method with cubic first step. Second derivatives were computed at every step ( $inh=1$ ). The initial step size ( $fsize$ ) was  $0.002 \text{ \AA-amu}^{1/2}$  within  $\pm 0.4 \text{ \AA-amu}^{1/2}$  of the saddle point in either direction. Thereafter, the step size ( $sstep$ ) was  $0.02 \text{ \AA-amu}^{1/2}$ . The length of the MEP (IRC) was determined by *percentdown*, which was set to include at least 90% of the barrier.

For the D isotopomer, the entire path was recomputed with atom 8 given a mass of 2.0141.

ISPE procedure (interpolated single-point energies along the MEP):  
Single point energies of 12 MEP points were computed with CCSD(T)/6-31++G\*\*. These were used in the VTST-ISPE interpolation procedure to correct the classical B3LYP potential energies along the MEP, retaining the frequencies previously calculated with B3LYP. A separate set of CCSD(T) single-point energies were computed for H and D isotopomeric MEPs.

---

### Polyrate dat file for H isotopomer

---

\*General

TITLE

Formose reaction:

glyceraldehyde anion + Ca++ -> dihydroxyacetone + Ca++

b3lyp/6-31++g\*\* , Page-McIver LQA Input in  $\text{\AA}$

END

ATOMS

1 C

2 O

3 C

4 O

5 C

6 O

7 H

8 H

9 H

10 H

11 H

12 Ca

END

NOSUPERMOL

writefu31

\*SECOND

HESSCAL HHOOK

\*OPTIMIZATION

OPTTS OHOOK

OPTMIN OHOOK

\*REACT1

status 2

GEOM

|    |           |           |           |
|----|-----------|-----------|-----------|
| 1  | 0.162332  | 1.621778  | -0.126068 |
| 2  | -1.026229 | 1.622753  | 0.194528  |
| 3  | 0.898914  | 0.365228  | -0.508591 |
| 4  | 0.128970  | -0.768715 | -0.482068 |
| 5  | 2.140977  | 0.188147  | 0.419687  |
| 6  | 2.678417  | -1.104256 | 0.158455  |
| 7  | 0.720026  | 2.575773  | -0.150426 |
| 8  | 1.302950  | 0.591476  | -1.524464 |
| 9  | 1.829352  | 0.261301  | 1.472983  |
| 10 | 2.916177  | 0.935340  | 0.224888  |
| 11 | 1.876624  | -1.625017 | -0.060424 |
| 12 | -2.105386 | -0.689403 | 0.117998  |

END

SPECIES NONLINRP

\*PROD1

status 2

GEOM

|    |           |           |           |
|----|-----------|-----------|-----------|
| 1  | 0.084063  | 1.570883  | 0.039663  |
| 2  | -1.271954 | 1.400906  | -0.002513 |
| 3  | 0.873585  | 0.274085  | -0.005873 |
| 4  | 0.302101  | -0.823647 | -0.001867 |
| 5  | 2.389015  | 0.291699  | -0.069307 |
| 6  | 2.940993  | -1.006178 | 0.062320  |
| 7  | 0.448275  | 2.079230  | 0.962215  |
| 8  | 0.491983  | 2.194321  | -0.787083 |
| 9  | 2.781985  | 0.942065  | 0.721359  |
| 10 | 2.678433  | 0.739486  | -1.031805 |
| 11 | 2.196561  | -1.630043 | -0.005918 |
| 12 | -2.222317 | -0.685685 | -0.005459 |

END

SPECIES NONLINRP

\*START

status 2

GEOM

|    |           |           |           |
|----|-----------|-----------|-----------|
| 1  | 0.102929  | 1.504782  | -0.047077 |
| 2  | -1.181071 | 1.538191  | -0.092184 |
| 3  | 0.829410  | 0.256431  | 0.022242  |
| 4  | 0.205706  | -0.875142 | -0.001839 |
| 5  | 2.312828  | 0.226245  | 0.357520  |
| 6  | 2.938747  | -0.889053 | -0.268751 |
| 7  | 0.687340  | 2.430939  | 0.048141  |
| 8  | 0.766353  | 0.989363  | -1.161103 |
| 9  | 2.396202  | 0.148167  | 1.452184  |
| 10 | 2.829904  | 1.133705  | 0.036811  |
| 11 | 2.272814  | -1.598514 | -0.256769 |
| 12 | -2.206534 | -0.661018 | 0.039341  |

END

SPECIES NONLINTS

\*PATH

dlx3 0.001  
SCALEMASS 1.0  
SSTEP 0.02  
INH 1  
NSTEPS 99999  
CURV dhess  
RPM pagem  
FIRSTSTEP cubic  
SIGN product

SRANGE  
slp 5.  
slm -5.  
END

prsavevp

specstop  
percentdown 92.  
end

sfirst  
nfstep 200  
fsize 0.002  
end

\*TUNNEL

ZCT  
SCT  
SCTOPT  
lagrange 4  
END

\*RATE

TST  
CVT

Temp  
150.  
175.  
200.  
233.  
273.  
313.  
353.  
End

Results for B3LYP/6-31++G\*\* without ISPE

**Polyrate  $\kappa_{\text{SCT}}(T)$  and forward rates (H isotopomer)**

| Temp   | $\kappa_{\text{SCT}}$ | Forward rates ( $\text{s}^{-1}$ ) |            |
|--------|-----------------------|-----------------------------------|------------|
|        |                       | CVT                               | CVT+SCT    |
| 200.00 | 2.5869E+01            | 1.0068E-03                        | 2.6046E-02 |
| 233.00 | 7.2555E+00            | 1.8788E-01                        | 1.3632E+00 |
| 273.00 | 3.5653E+00            | 1.9867E+01                        | 7.0830E+01 |
| 313.00 | 2.4627E+00            | 6.4684E+02                        | 1.5930E+03 |
| 353.00 | 1.9712E+00            | 9.6550E+03                        | 1.9032E+04 |

**Polyrate  $\kappa_{\text{SCT}}(T)$  and forward rates (D isotopomer)**

| Temp   | $\kappa_{\text{SCT}}$ | Forward rates ( $\text{s}^{-1}$ ) |            |
|--------|-----------------------|-----------------------------------|------------|
|        |                       | CVT                               | CVT+SCT    |
| 200.00 | 6.3561E+00            | 1.5788E-04                        | 1.0035E-03 |
| 233.00 | 3.3295E+00            | 3.8231E-02                        | 1.2729E-01 |
| 273.00 | 2.2482E+00            | 5.0920E+00                        | 1.1448E+01 |
| 313.00 | 1.8035E+00            | 1.9678E+02                        | 3.5489E+02 |
| 353.00 | 1.5700E+00            | 3.3525E+03                        | 5.2634E+03 |

Results for CCSD(T)/6-31++G\*\*//B3LYP/6-31++G\*\* ISPE

**Polyrate  $\kappa_{\text{SCT}}(T)$  and forward rates (H isotopomer)**

| Temp   | $\kappa_{\text{SCT}}$ | Forward rates ( $\text{s}^{-1}$ ) |            |
|--------|-----------------------|-----------------------------------|------------|
|        |                       | CVT                               | CVT+SCT    |
| 200.00 | 1.2584E+02            | 5.0868E-09                        | 6.4012E-07 |
| 233.00 | 1.4232E+01            | 5.3398E-06                        | 7.5995E-05 |
| 273.00 | 4.9711E+00            | 2.6176E-03                        | 1.3012E-02 |
| 313.00 | 3.0356E+00            | 2.6696E-01                        | 8.1040E-01 |
| 353.00 | 2.2865E+00            | 9.6362E+00                        | 2.2033E+01 |

**Polyrate  $\kappa_{\text{SCT}}(T)$  and forward rates (D isotopomer)**

| Temp   | $\kappa_{\text{SCT}}$ | Forward rates ( $\text{s}^{-1}$ ) |            |
|--------|-----------------------|-----------------------------------|------------|
|        |                       | CVT                               | CVT+SCT    |
| 200.00 | 1.1887E+01            | 7.9612E-10                        | 9.4634E-09 |
| 233.00 | 4.4973E+00            | 1.0850E-06                        | 4.8796E-06 |
| 273.00 | 2.6735E+00            | 6.7018E-04                        | 1.7917E-03 |
| 313.00 | 2.0275E+00            | 8.1139E-02                        | 1.6451E-01 |
| 353.00 | 1.7106E+00            | 3.3433E+00                        | 5.7191E+00 |
